# Supplementary material
Source: PubMed Central journal article supplement (PMC2600913)
Supplement: rspb20071760s04.pdf [file rspb20071760s04.pdf]

# Appendix 1

## Supplementary Discussion

**Field Survey.** Two factors may have resulted in the relatively high within-site variation in penis size (Fig. 2a). First, variation in any correlations involving soma mass might arise due to variation in reproductive condition, either directly because penis morphology is known to vary with reproductive condition in many barnacle species, or indirectly because testes and seminal vesicles are part of the soma mass used as a proxy for body size. Second, although we visually controlled for density during collection, density of surrounding individuals may have varied slightly between samples and may play a role in barnacle penis length.

**Field Transplant Experiment.** Although some experimental barnacles died during the transplant experiment (see Methods), our results are unlikely to be influenced by differential mortality. First, a mismatch between penis form and flow conditions is not likely to cause any direct mortality. Second, we found no empty barnacle shells on the transplant plates, implying that all barnacles died due to dislodgement from waves (any other cause of mortality would have left intact shells attached to the transplant plates) not from mismatched penis form. Third, exposed-shore barnacles presumably adapted to high flow conditions still experienced mortality at the exposed site during the experiment. Finally, because barnacle legs and penises must both extend into flow, and barnacle legs are highly plastic in response to flow at these same sites, conditions that favour plasticity in legs are highly likely to favour plasticity in penises as well. Collectively these observations strongly suggest that phenotypic plasticity is responsible for producing the different morphologies observed in different growth environments.

## Supplementary Results

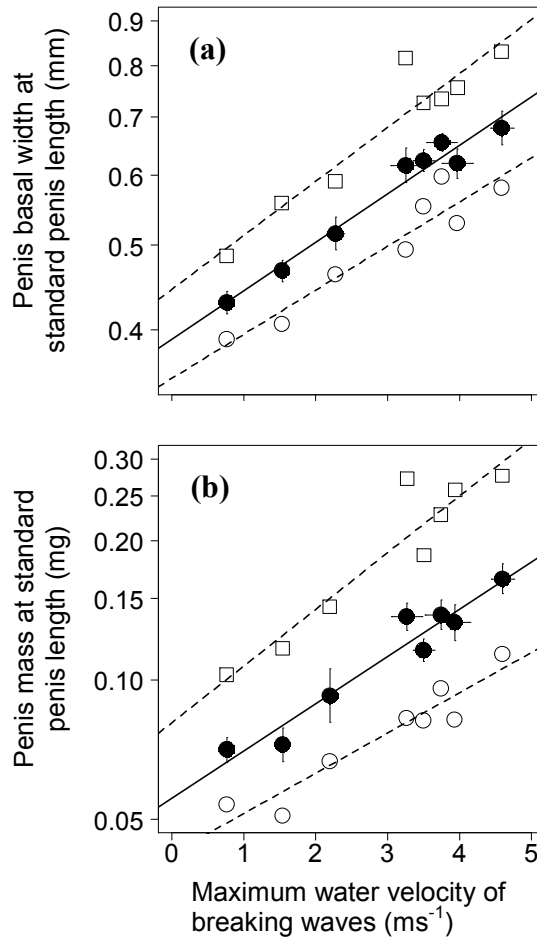

**fig. S1.** Variation in penis shape of the barnacle *Balanus glandula* as a function of wave-exposure, standardized to first quartile (open circles), mean (closed circles), and third quartile (open squares) of penis length using ANCOVA assuming unequal slopes among sites. **(a)** Penis basal width at standard penis length (corresponds to Fig. 2c). **(b)** Penis mass at standard penis length (corresponds to Fig. 2d). All points are mean  $\pm$  s.e.m. (error bars are only shown for closed circles for clarity and are smaller than the symbols where they appear absent).

**table S1. Field Survey scaling relationships\*.**

| x                 | y                      | Predicted isometric slope | df    | r      | RMA slope | Probability slopes do not differ from isometry |
|-------------------|------------------------|---------------------------|-------|--------|-----------|------------------------------------------------|
| Log(soma mass)    | Log(penis length)      | 0.333                     | 1,151 | 0.6957 | 0.3612    | 0.188                                          |
| Log(soma mass)    | Log(penis mass)        | 1                         | 1,149 | 0.907  | 1.0072    | 0.492                                          |
| Log(soma mass)    | Log(penis basal width) | 0.33                      | 1,154 | 0.8572 | 0.3762    | 0.008                                          |
| Log(penis mass)   | Log(penis length)      | 3                         | 1,154 | 0.7911 | 3.1496    | 0.27                                           |
| Log(penis length) | Log(penis basal width) | 1                         | 1,150 | 0.6933 | 1.2154    | <0.001                                         |

(\* Slopes, and therefore coefficients of allometry, did not vary significantly among sites:  $\alpha = 0.01$  after Bonferroni Correction for multiple comparisons,  $P > 0.0128$  for equality of slopes for all scaling relationships.)

**table S2. Field Survey ANCOVA statistics.**

| Source of variation | Log(penis length) |       |        |        | Log(penis mass) |        |        |        |
|---------------------|-------------------|-------|--------|--------|-----------------|--------|--------|--------|
|                     | df                | MS    | F      | p      | df              | MS     | F      | p      |
| Log(soma mass)      | 1                 | 0.936 | 162.10 | <0.001 | 1               | 13.787 | 676.53 | <0.001 |
| Field site          | 7                 | 0.025 | 4.29   | <0.001 | 7               | 0.018  | 0.86   | 0.539  |
| Equality of slopes  | 7                 | 0.007 | 1.13   | 0.245  | 7               | 0.015  | 0.747  | 0.632  |
| Residual            | 136               | 0.006 | -      | -      | 135             | 0.020  | -      | -      |

| Source of variation | Log(penis basal width) |       |        |         | Log(penis mass) |        |        |        |
|---------------------|------------------------|-------|--------|---------|-----------------|--------|--------|--------|
|                     | df                     | MS    | F      | p       | df              | MS     | F      | p      |
| Log(penis length)   | 1                      | 1.341 | 260.66 | <0.0001 | 1               | 10.371 | 385.57 | <0.001 |
| Field site          | 7                      | 0.093 | 18.13  | <0.0001 | 7               | 0.325  | 12.09  | <0.001 |
| Equality of slopes  | 7                      | 0.014 | 2.67   | 0.013   | 7               | 0.057  | 2.13   | 0.045  |
| residual            | 136                    | 0.005 | -      | -       | 131             | 0.027  | -      | -      |

**table S3. Field Survey regression statistics calculated using estimated winter water velocities.**

|                                   | log(penis length at standard soma mass) |       |        |       |                    |
|-----------------------------------|-----------------------------------------|-------|--------|-------|--------------------|
|                                   | df                                      | MS    | F      | p     | adjusted r-squared |
| water velocity (from leg lengths) | 1                                       | 0.007 | 16.476 | 0.007 | 0.689              |
| residual                          | 6                                       | 0.000 |        |       |                    |

|                                   | log(penis mass at standard soma mass) |       |        |       |                    |
|-----------------------------------|---------------------------------------|-------|--------|-------|--------------------|
|                                   | df                                    | MS    | F      | p     | adjusted r-squared |
| water velocity (from leg lengths) | 1                                     | 0.006 | 37.857 | 0.001 | 0.840              |
| residual                          | 6                                     | 0.000 |        |       |                    |

|                                   | log(penis basal width at standard penis length) |       |         |        |                    |
|-----------------------------------|-------------------------------------------------|-------|---------|--------|--------------------|
|                                   | df                                              | MS    | F       | p      | adjusted r-squared |
| water velocity (from leg lengths) | 1                                               | 0.032 | 154.050 | <0.001 | 0.956              |
| residual                          | 6                                               | 0.000 |         |        |                    |

|                                   | log(penis mass at standard penis length) |       |         |        |                    |
|-----------------------------------|------------------------------------------|-------|---------|--------|--------------------|
|                                   | df                                       | MS    | F       | p      | adjusted r-squared |
| water velocity (from leg lengths) | 1                                        | 0.119 | 149.050 | <0.001 | 0.955              |
| residual                          | 6                                        | 0.001 |         |        |                    |

**table S4.** Field Survey regression statistics calculated using summer water velocities.

|                       | log(penis length at standard soma mass) |       |          |          |                |
|-----------------------|-----------------------------------------|-------|----------|----------|----------------|
|                       | df                                      | MS    | <i>F</i> | <i>p</i> | adjusted $r^2$ |
| summer water velocity | 1                                       | 0.007 | 21.137   | 0.004    | 0.742          |
| residual              | 6                                       | 0.002 | 0.000    |          |                |

  

|                       | log(penis mass at standard soma mass) |       |          |          |                |
|-----------------------|---------------------------------------|-------|----------|----------|----------------|
|                       | df                                    | MS    | <i>F</i> | <i>p</i> | adjusted $r^2$ |
| summer water velocity | 1                                     | 0.006 | 63.669   | <0.001   | 0.900          |
| residual              | 6                                     | 0.001 |          |          |                |

  

|                       | log(penis basal width at standard penis length) |       |          |          |                |
|-----------------------|-------------------------------------------------|-------|----------|----------|----------------|
|                       | df                                              | MS    | <i>F</i> | <i>p</i> | adjusted $r^2$ |
| summer water velocity | 1                                               | 0.028 | 30.672   | 0.001    | 0.809          |
| residual              | 6                                               | 0.001 |          |          |                |

  

|                       | log(penis mass at standard penis length) |       |          |          |                |
|-----------------------|------------------------------------------|-------|----------|----------|----------------|
|                       | df                                       | MS    | <i>F</i> | <i>p</i> | adjusted $r^2$ |
| summer water velocity | 1                                        | 0.114 | 69.613   | <0.001   | 0.907          |
| residual              | 6                                        | 0.002 |          |          |                |

**table S5.** Field Survey regression statistics calculated on data standardized to first and third quartiles of penis length for ANCOVAs with interactions.

|                                   | log(penis basal width at 1st quartile of penis length) |       |          |          |                |
|-----------------------------------|--------------------------------------------------------|-------|----------|----------|----------------|
|                                   | df                                                     | MS    | <i>F</i> | <i>p</i> | adjusted $r^2$ |
| water velocity (from leg lengths) | 1                                                      | 0.030 | 54.290   | <0.001   | 0.884          |
| residual                          | 6                                                      | 0.001 |          |          |                |

  

|                                   | log(penis basal width at 3rd quartile of penis length) |       |          |          |                |
|-----------------------------------|--------------------------------------------------------|-------|----------|----------|----------------|
|                                   | df                                                     | MS    | <i>F</i> | <i>p</i> | adjusted $r^2$ |
| water velocity (from leg lengths) | 1                                                      | 0.045 | 55.337   | <0.001   | 0.886          |
| residual                          | 6                                                      | 0.001 |          |          |                |

  

|                                   | log(penis mass at 1st quartile of penis length) |       |          |          |                |
|-----------------------------------|-------------------------------------------------|-------|----------|----------|----------------|
|                                   | df                                              | MS    | <i>F</i> | <i>p</i> | adjusted $r^2$ |
| water velocity (from leg lengths) | 1                                               | 0.091 | 57.944   | <0.001   | 0.891          |
| residual                          | 6                                               | 0.002 |          |          |                |

  

|                                   | log(penis mass at 3rd quartile of penis length) |       |          |          |                |
|-----------------------------------|-------------------------------------------------|-------|----------|----------|----------------|
|                                   | df                                              | MS    | <i>F</i> | <i>p</i> | adjusted $r^2$ |
| water velocity (from leg lengths) | 1                                               | 0.181 | 47.002   | <0.001   | 0.868          |
| residual                          | 6                                               | 0.004 |          |          |                |

**table S6.** Field Transplant ANCOVA statistics.

|                            | Log10(penis length) |       |          |          |     |
|----------------------------|---------------------|-------|----------|----------|-----|
|                            | df                  | MS    | <i>F</i> | <i>p</i> |     |
| Log10(soma mass) (sm)      | 1                   | 0.463 | 42.920   | 0.000    | *** |
| Growth environment (env)   | 1                   | 0.167 | 15.460   | 0.000    | *** |
| Source population (source) | 1                   | 0.004 | 0.392    | 0.534    |     |
| sm x env                   | 1                   | 0.050 | 4.591    | 0.038    | *   |
| sm x source                | 1                   | 0.000 | 0.001    | 0.979    |     |
| source x env               | 1                   | 0.001 | 0.108    | 0.743    |     |
| Error                      | 45                  | 0.011 |          |          |     |

  

|                            | Log10(penis basal width) |       |          |          |     |
|----------------------------|--------------------------|-------|----------|----------|-----|
|                            | df                       | MS    | <i>F</i> | <i>p</i> |     |
| Log10(penis length) (pl)   | 1                        | 0.171 | 44.360   | 0.000    | *** |
| Growth environment (env)   | 1                        | 0.045 | 11.565   | 0.001    | **  |
| Source population (source) | 1                        | 0.007 | 1.897    | 0.175    |     |
| pl x env                   | 1                        | 0.003 | 0.707    | 0.405    |     |
| pl x source                | 1                        | 0.000 | 0.065    | 0.800    |     |
| source x env               | 1                        | 0.002 | 0.577    | 0.452    |     |
| Error                      | 46                       | 0.004 |          |          |     |

(\*\*\*  $p < 0.001$ , \*\*  $p < 0.01$ , \*  $p < 0.05$ )
